# Supplementary material for: Relationship between emotional divorce and alexithymia among married women in Saudi Arabia
Source: PubMed Central journal article supplement (PMC10398916; doi:10.1186/s40359-023-01236-w), 2023-08-02
Supplement: 40359_2023_1236_MOESM1_ESM.pdf [file 40359_2023_1236_MOESM1_ESM.pdf]

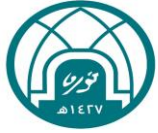

### Demographic Questions for Survey

1. Age: What is your age?
  - a. 18-25
  - b. 25-30
  - c. 30-35
  - d. 35 or older
  
2. Gender: What is your gender?
  - a. Male
  - b. Female
  
3. Can you read Arabic?
  - a. Yes
  - b. No
  
4. Employment: Are you an employee?
  - a. Yes
  - b. No
  
5. Children: How many children do you have?
  - a.  $\leq 1$  children
  - b. 2-4 children
  - c.  $\geq 5$  children
  
6. Marital Status: What is your marital status?
  - a. Single
  - c. Married
  - d. Separated
  - e. Divorced
  - f. Widowed
  
7. Marriage duration: How long is marriage?
  - a.  $\leq 4$  years
  - b. 5-9 years
  - c.  $\geq 10$  years

8. Do you have an intellectual disability?

- a. Yes
- b. No

9. What's your nationality?

- a. Saudi
- b. Non-Saudi
